# Supplementary material
Source: PubMed Central journal article supplement (PMC7060689)
Supplement: pnas.1921724117.sapp.pdf [file pnas.1921724117.sapp.pdf]

# PNAS

[www.pnas.org](http://www.pnas.org)

Supplementary Information for

Climate and Plant Community Diversity in Space and Time

Susan Harrison, Marko Spasojevic, Daijiang Li

[spharrison@ucdavis.edu](mailto:spharrison@ucdavis.edu)

**This PDF file includes:**

Figures S1 to S2

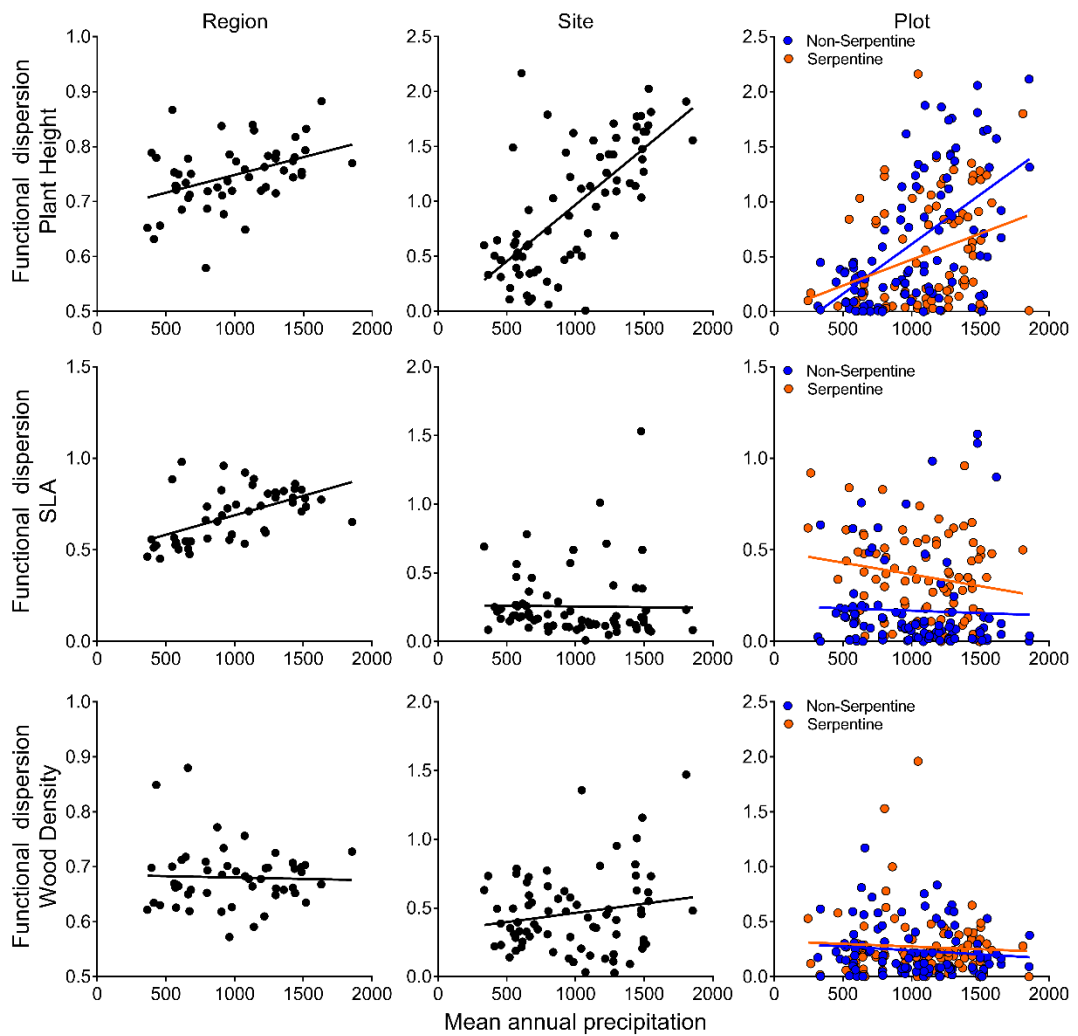

Figure S1. Functional diversity (dispersion) of individual plant traits versus mean annual precipitation. **Plant height:** regional scale ( $p = 0.002$ ), site scale ( $p < 0.001$ ), plot scale (rainfall  $p < 0.001$ , soil type  $p = 0.023$ , interaction  $p = 0.022$ ). **Specific leaf area (SLA):** regional ( $p < 0.001$ ), site ( $p = 0.882$ ), plot (rainfall  $p = 0.152$ , soil type  $p < 0.001$ , interaction  $p = 0.352$ ). **Wood density:** regional ( $p = 0.810$ ), site ( $p = 0.123$ ), plot (rainfall  $p = 0.269$ , soil type  $p = 0.345$ , interaction  $p = 0.818$ ).

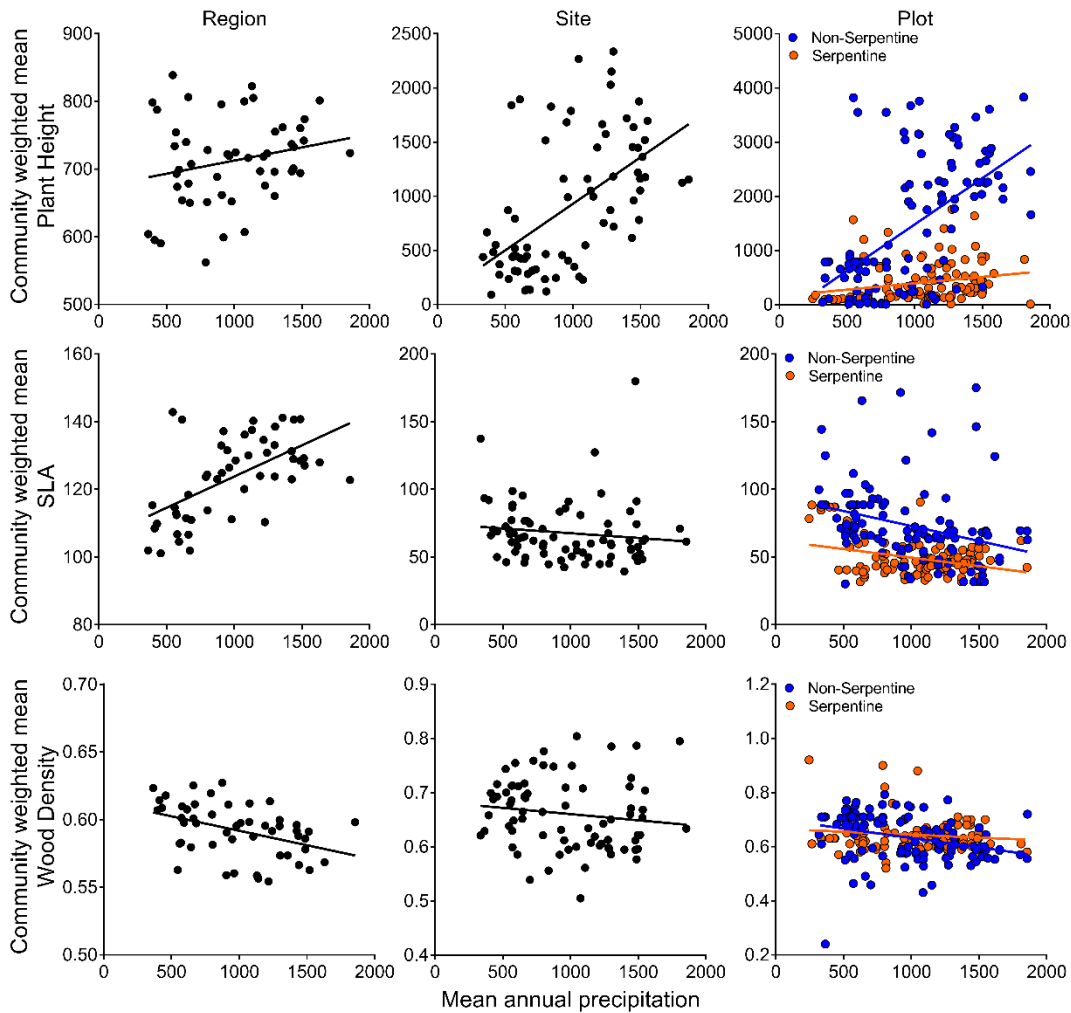

Figure S2. Community weighted means of individual plant traits versus mean annual precipitation. **Plant height:** regional scale ( $p = 0.107$ ), site scale ( $p < 0.001$ ), plot scale (rainfall  $p < 0.001$ , soil type  $p < 0.001$ , interaction  $p < 0.001$ ). **Specific leaf area (SLA):** regional ( $p < 0.001$ ), site ( $p = 0.288$ ), plot (rainfall  $p < 0.001$ , soil type  $p < 0.001$ , interaction  $p = 0.113$ ). **Wood density:** regional ( $p = 0.002$ ), site ( $p = 0.230$ ), plot (rainfall  $p = 0.005$ , soil type  $p = 0.280$ , interaction  $p = 0.046$ ).
